# Supplementary material
Source: PubMed Central journal article supplement (PMC3228447)
Supplement: 1105857108_pnas.201105857SI.pdf [file 1105857108_pnas.201105857SI.pdf]

# Supporting Information

Baschant et al. 10.1073/pnas.1105857108

## SI Materials and Methods

**Mice.** BALB/c mice (Charles River Laboratories) and GR<sup>dim</sup> (1), GR<sup>LysMCre</sup> (2), and GR<sup>LckCre</sup> (3) were back-crossed for at least four generations to the BALB/c background. GR<sup>CD11cCre</sup> and GR<sup>CD19Cre</sup> mice were generated by crossing to CD11cCre transgenic (4) and CD19Cre mice (5), respectively, and were back-crossed for at least four generations to the C57BL/6 background. GR<sup>dim</sup> mice were also crossed for 12 generations to the DBA/1 background. IL-17A<sup>-/-</sup> (C57BL/6) and IFN- $\gamma$ <sup>-/-</sup> (C57BL/6) mice were supplied by Yoichiro Iwakura (Tokyo, Japan) and the Jackson Laboratory, respectively. The mice were kept under specific pathogen-free conditions.

**Antigen-Induced Arthritis.** In brief, mice were immunized with 100  $\mu$ g methylated BSA (mBSA; Sigma-Aldrich) emulgated 1:1 with complete Freund's adjuvant (Sigma-Aldrich) supplemented with 1 mg/mL *Mycobacterium tuberculosis* (Difco) and simultaneously treated i.p. with  $5 \times 10^8$  heat-inactivated *Bordetella pertussis* (Chiron-Behring) at days 21 and 14 before arthritis induction. Arthritis was induced by an intraarticular injection of 100  $\mu$ g mBSA into the right knee joint cavity (6). This was followed by i.v. treatment with 1.25 mg/kg Methylprednisolone (Novosom AG) or PBS at 4, 24, and 48 h. Knee joint swelling was determined using an Oditest caliper (Kroeplin) and expressed relative to the knee diameter at day 0 (before arthritis induction).

**Glucose-6-Phosphate Isomerase-Induced Arthritis.** Glucose-6-phosphate isomerase-induced arthritis (G6PI-IA) was established as described elsewhere (7) using 6- to 10-wk-old GR<sup>dim</sup> mice (DBA/1 background) and monitored for 30 d. A score of 0 indicated no clinical signs of arthritis, 1 slight swelling and redness, 2 strong swelling and redness, and 3 massive swelling and redness. Dexamethasone (Dex; 1 mg/kg; Sigma-Aldrich) or PBS was applied daily i.p. starting from day 9 (onset of the disease) until day 15.

**Histology.** Knee joints were removed at day 1 after AIA induction, fixed in phosphate-buffered 4% formalin for 24 h, and subsequently decalcified with 15% EDTA, dehydrated, and embedded in paraffin, and 6- $\mu$ m sections were stained with H&E. Histological scoring was performed blindly according to Tolks and Földi's grading of joint inflammation from 0 to 3 regarding (i) cellular infiltration, (ii) fibrin exudation into the joint space, (iii) lining cell layer, and (iv) synovitis of subintimal connective tissue, and the average was calculated (8).

**Serum Analysis.** Eight hours after AIA induction, several cytokines (IFN- $\gamma$ , IL-6, IL-17, and TNF- $\alpha$ ) were analyzed in serum with a cytometric bead array (BD Biosciences) and subsequent flow cytometry according to the manufacturer's instructions.

Blood was taken from the animals 24 h after AIA induction. Protein levels of IL-6, IL-17, and IFN- $\gamma$  were measured by a sandwich ELISA (R&D Systems) according to the manufacturer's instructions.

**Lymph Node Cell Analysis.** Cells from draining lymph nodes (inguinal and popliteal) were isolated 24 h after AIA induction, and 1 mL was cultured ( $7.5 \times 10^6$  cells/mL; 48-well plates; 37 °C, 5% CO<sub>2</sub>) in RPMI medium (PAA Laboratories) containing 10% FCS, 1% penicillin/streptomycin, and 50  $\mu$ M 2-mercapto-ethanol (Gibco) with either 25  $\mu$ g mBSA or with 5 ng/mL 4 $\alpha$ -phorbol 12-myristate 13-acetate and 1  $\mu$ g/mL ionomycin. After 2 h, brefeldin A (eBioscience) was added, and after a further 4 h, cells were harvested for flow cytometry. Cells were subsequently stained with anti-CD4-PECy7 (L3T3), anti-CD154-APC, anti-IL17A-FITC (eBio17B7), anti-IFN- $\gamma$ -PE (XMG1.1), and anti-TNF- $\alpha$ -eF405 (MP6-XT22).

**Proliferation and Apoptosis Measurements.** BrdU (2 mg) was injected i.p. 4 h after arthritis induction in glucocorticoid (GC)- and PBS-treated mice. Twenty hours after BrdU application, inguinal and popliteal lymph nodes were removed and isolated cells stained for flow cytometry [anti-CD4-PECy7, anti-CD3-APC (17A2)], fixed and permeabilized (BD Cytofix/Cytoperm Buffer), and subsequently stained with anti-BrdU (FITC) antibody (BD Biosciences). Apoptosis was determined by incubating lymph node cells with FITC-labeled annexin V and 50  $\mu$ g/mL propidium iodide (Molecular Probes). FACS analysis was performed using a FACSCanto (BD Biosciences), and the data were processed with FlowJo software (version 8.7; Tree Star).

**T<sub>H</sub>17 in Vitro Differentiation.** Naïve CD4<sup>+</sup>TCR $\beta$ <sup>+</sup>CD62L<sup>high</sup>CD44<sup>low</sup> cells were purified from spleens and lymph nodes of BALB/c mice by flow cytometry sorting (FACSaria; BD Biosciences) after staining with anti-CD4-PECy7, anti-TCR $\beta$ -APC (H57-597), anti-CD62L-FITC (MEL-14), and anti-CD44-PE (IM7) antibodies. Purified T cells were activated by plate-bound anti-CD3 and anti-CD28 antibodies (5  $\mu$ g/mL of each) and cultured in the presence of 10  $\mu$ g/mL anti-IL-4 (11B11), 10  $\mu$ g/mL anti-IFN- $\gamma$  (XMG.1) (eBioscience), IL-6 (PeproTech), TGF- $\beta$  (PeproTech), IL-1 $\beta$  (ImmunoTools), and TNF- $\alpha$  (ImmunoTools). After 7 d, cells were restimulated with plate-bound anti-CD3 and anti-CD28 antibodies (5  $\mu$ g/mL of each) for 6 h, in the presence of brefeldin A for the final 4 h, and treated with 1  $\mu$ M Dex. Subsequently, cells were analyzed by FACS as described above.

**Quantitative Real-Time PCR for Recombination Efficiencies.** Leukocytes of GR<sup>CD11cCre</sup>, GR<sup>CD19Cre</sup>, and GR<sup>LckCre</sup> mice were purified from different hematopoietic organs using flow cytometry sorting (FACSaria; BD Biosciences) after staining with indicated cell surface markers. DNA was isolated from the purified cells, and quantitative real-time PCR amplifying the GR<sup>lox</sup> allele was performed with an iCycler (Bio-Rad) using a Sensi-Mix DNA Kit containing SYBR Green (Invitrogen). Primer information can be supplied on request.

- Reichardt HM, et al. (1998) DNA binding of the glucocorticoid receptor is not essential for survival. *Cell* 93:531–541.
- Tuckermann JP, et al. (2007) Macrophages and neutrophils are the targets for immune suppression by glucocorticoids in contact allergy. *J Clin Invest* 117:1381–1390.
- Baumann S, et al. (2005) Glucocorticoids inhibit activation-induced cell death (AICD) via direct DNA-dependent repression of the CD95 ligand gene by a glucocorticoid receptor dimer. *Blood* 106:617–625.
- Caton ML, Smith-Raska MR, Reizis B (2007) Notch-RBP-J signaling controls the homeostasis of CD8<sup>+</sup> dendritic cells in the spleen. *J Exp Med* 204:1653–1664.

- Rickert RC, Roes J, Rajewsky K (1997) B lymphocyte-specific, Cre-mediated mutagenesis in mice. *Nucleic Acids Res* 25:1317–1318.
- Brackertz D, Mitchell GF, Mackay IR (1977) Antigen-induced arthritis in mice. I. Induction of arthritis in various strains of mice. *Arthritis Rheum* 20:841–850.
- Schubert D, Maier B, Morawietz L, Krenn V, Kamradt T (2004) Immunization with glucose-6-phosphate isomerase induces T cell-dependent peripheral polyarthritis in genetically unaltered mice. *J Immunol* 172:4503–4509.
- Berry EC, Grundmann E, Kirsten W (1982) *Bone and Joint Disease (Current Topics in Pathology)* (Springer, New York).









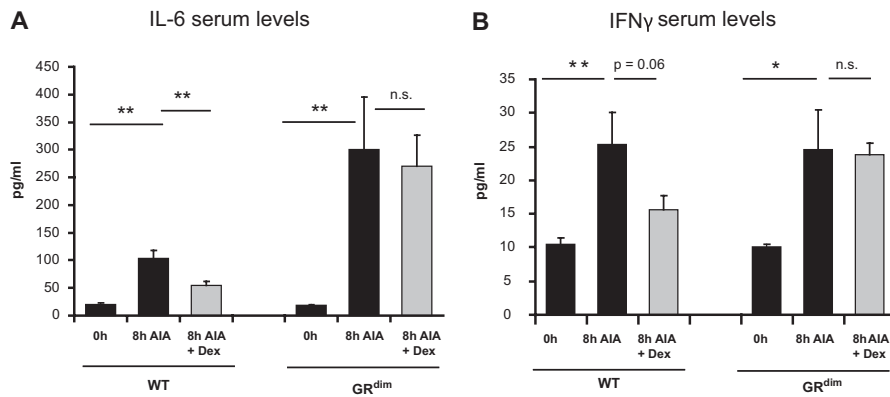

**Fig. 55.** Serum cytokine levels in PBS- and Dex-treated arthritic WT and GR<sup>dim</sup> mice 8 h after AIA induction. IL-6 (A) and IFN- $\gamma$  (B) were determined in WT and GR<sup>dim</sup> animals treated as described in Fig. 1A 8 h after AIA induction. In A and B,  $n = 5-6$ ; \* $P < 0.05$ , \*\* $P < 0.01$ ; n.s., not significant.

**A** Glucose-6 Phosphate-Isomerase(G6PI) induced arthritis

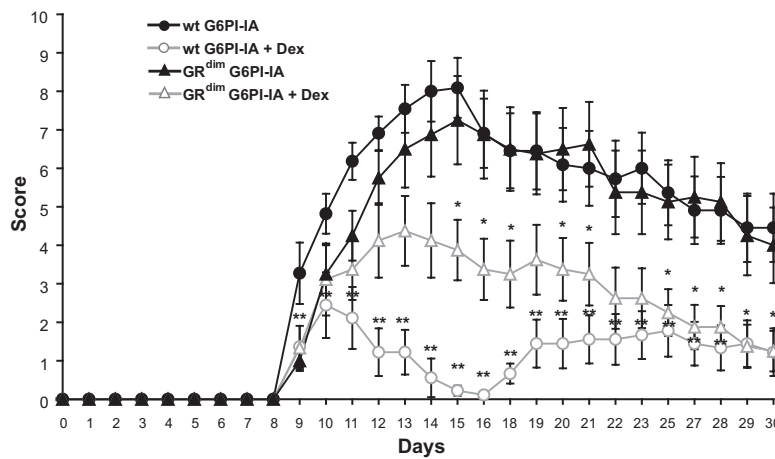

**Fig. 56.** G6PI-IA in WT and GR<sup>dim</sup> mice. (A) WT and GR<sup>dim</sup> mice were immunized with G6PI and treated from day 9 until day 15 with PBS or 1 mg/kg Dex. Paw swelling was scored from day 0 to day 30 at indicated time points. (B) Severity of G6PI-IA at day 12. In both panels,  $n = 5$ ; \* $P < 0.05$ ; \*\* $P < 0.01$ ; n.s., not significant.

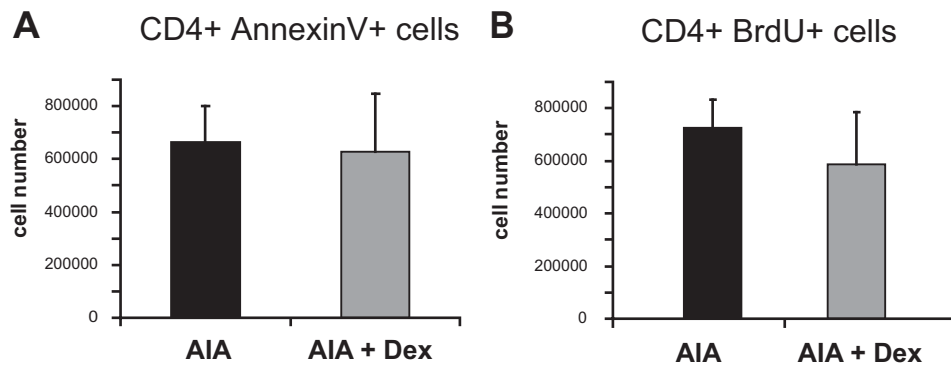

**Fig. 57.** Apoptosis and proliferation of total lymph node cells from PBS- and Dex-treated WT mice at day 1 after AIA induction. (A) Apoptosis was determined by annexin V-positive cells by flow cytometry analysis of CD4<sup>+</sup> cells ( $n = 5$ ). (B) Proliferation was measured by determination of BrdU incorporation after 24 h. Single cell suspensions of draining lymph nodes were analyzed by flow cytometry for BrdU-positive cells ( $n = 5$ ).





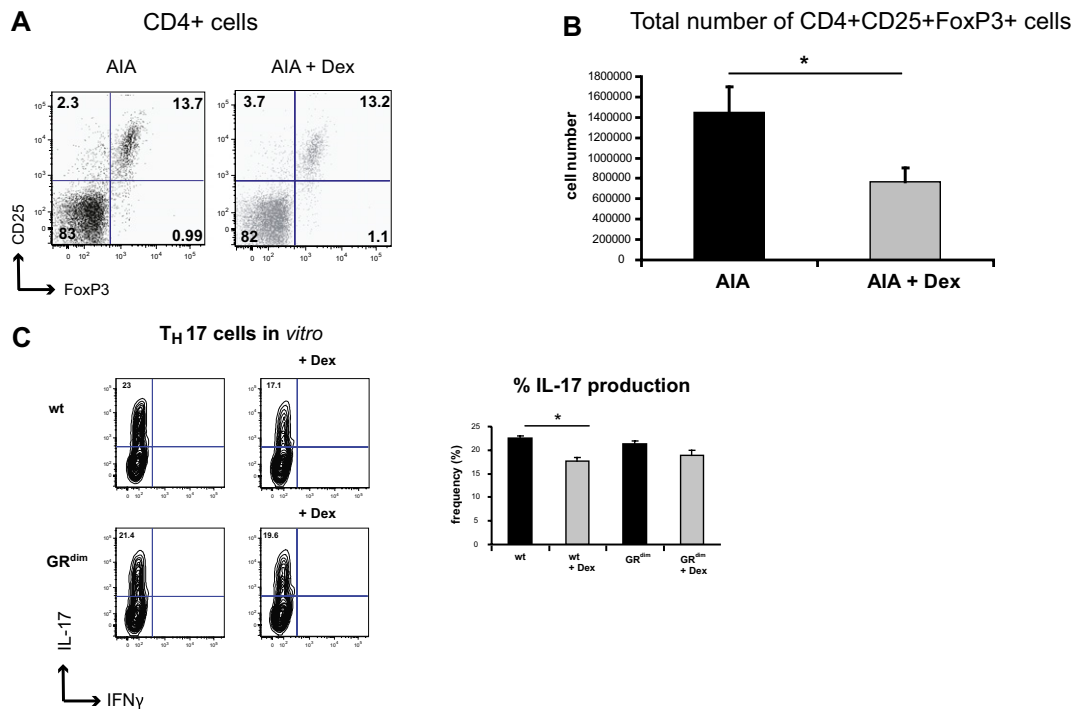

**Fig. S9.** Regulatory T cells in the draining lymph nodes from PBS- and Dex-treated WT mice at day 1 after AIA induction and influence of GCs on IL-17 production in TH17 cells. (A) FACS analysis of restimulated (6 h with 25  $\mu$ g mBSA) lymph node cells stained for CD25, CD4, and FoxP3. A representative plot of CD25<sup>+</sup>FoxP3<sup>+</sup> cells of the CD4<sup>+</sup> gate is shown. Numbers indicate the mean of frequencies. (B) Total number of regulatory T cells in draining lymph nodes of mice ( $n = 5$ ;  $*P < 0.05$ ). (C) Naïve T cells from WT and GR<sup>dim</sup> mice were sorted for CD4<sup>+</sup>TCR $\beta$ <sup>+</sup>CD62L<sup>high</sup>CD44<sup>low</sup> cells and differentiated for 7 d under TH17-promoting conditions. After 7 d, TH17 cells were restimulated for 6 h and treated with a pharmacological dose ( $10^{-6}$  M) of Dex. Representative FACS images with mean values of frequencies are shown. The graph shows the mean and SD of IL-17 frequencies ( $n = 3$ ;  $*P < 0.05$ ).
